# Supplementary material
Source: publisher figshare collection journal article supplement (https://sage.figshare.com/ndownloader/files/20333574)
Supplement: Supplementary file 1 [file 20333574]

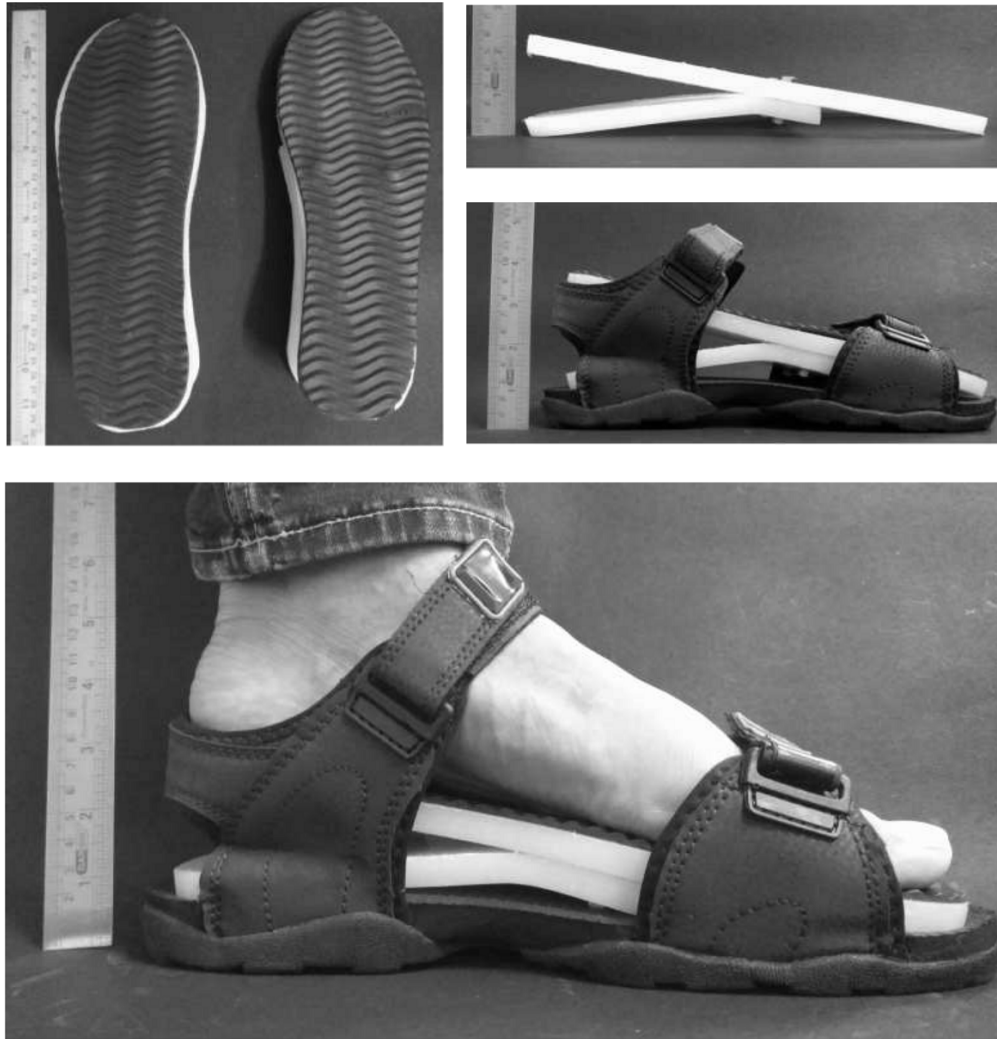

Figure A1 – The orthotic insert used in this study various orientations and after insertion into the shoe, and foot placement.

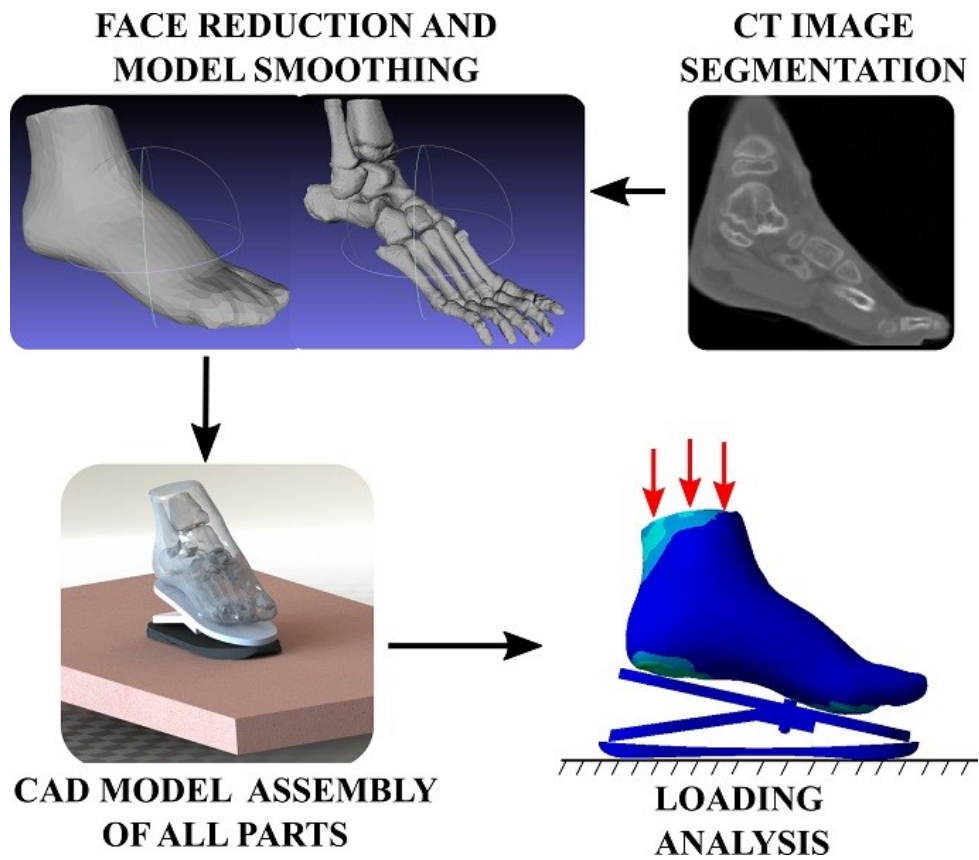

Figure A2 - The workflow adopted in the finite element analysis.

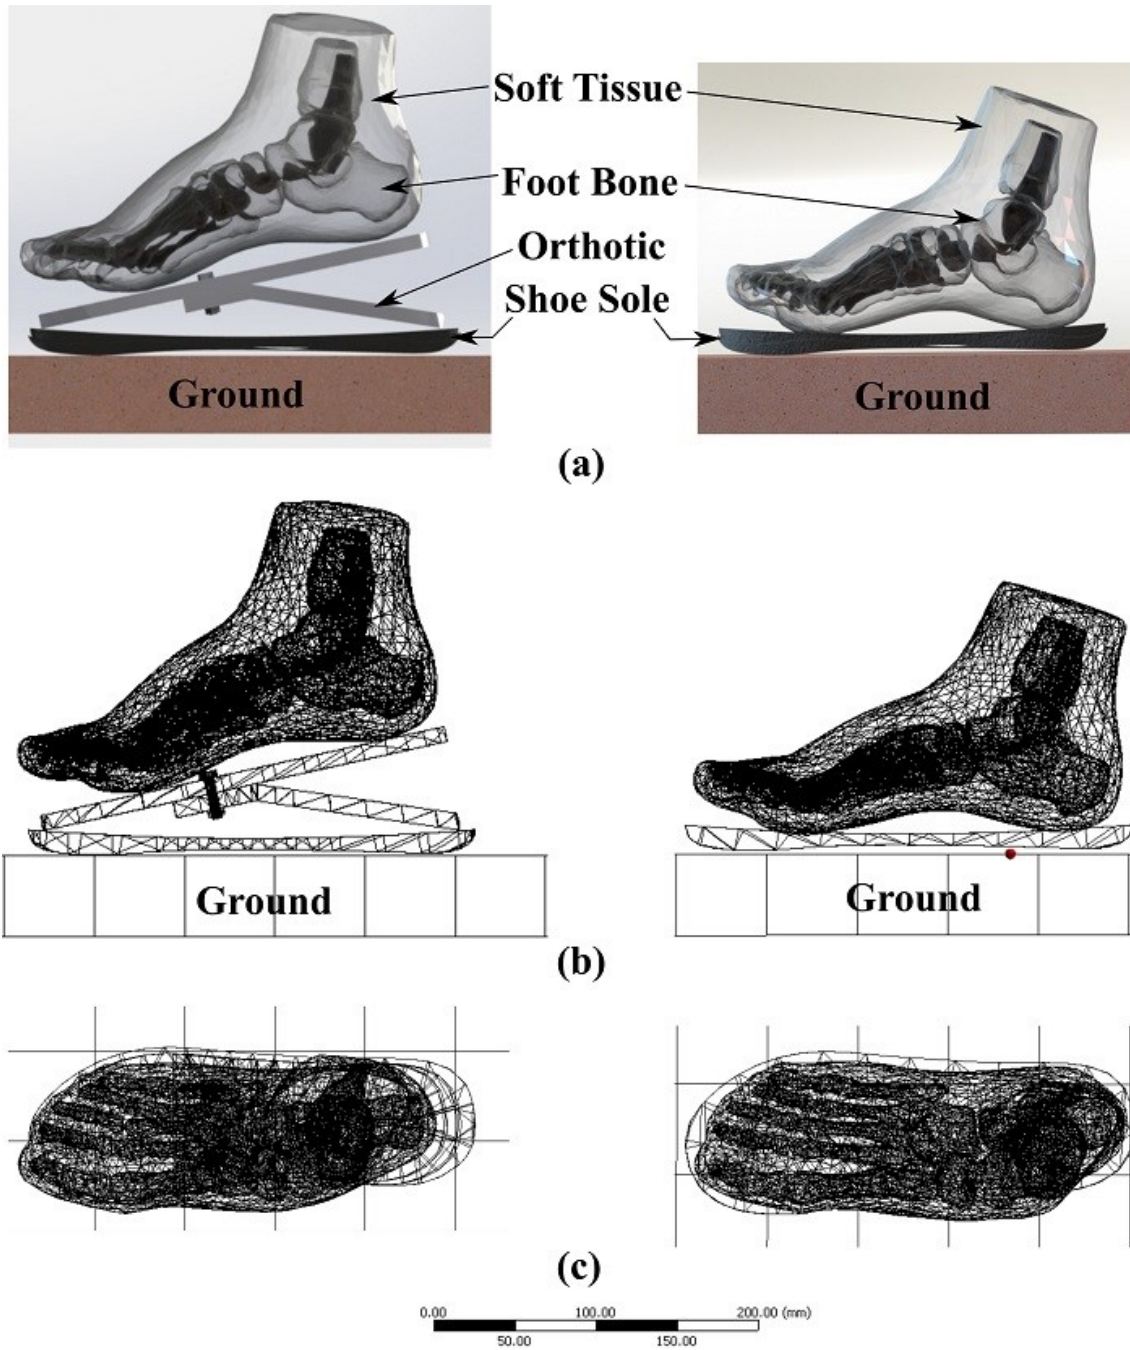

Figure A3 - (a) The foot bone and tissue assembly with and without orthotic, (b) side view of the meshed assembly, and (c) top view of the meshed assembly.
